# Supplementary material for: Widespread specific intron retention events in nuclear RNA complexes identified by sedimentation analysis of pluripotent cellular extracts
Source: HighWire-hosted journal article supplement (doi:10.1101/gr.280431.125), 2025-08-26
Supplement: Supplemental_Material.pdf [file Supplemental_Material.pdf]

## Supplemental material – Pereira et al.

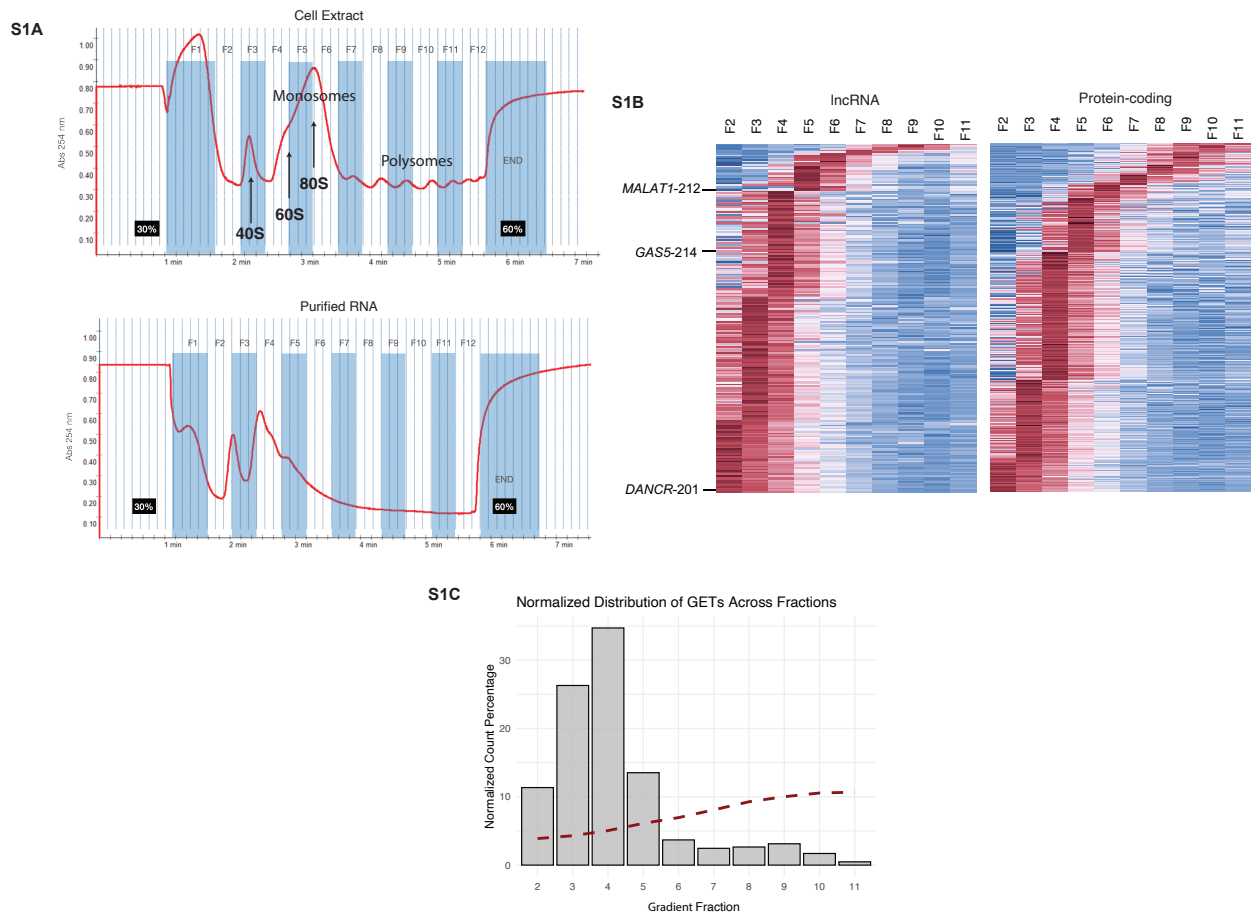

**Supplemental Fig S1.** (A) Absorbance (254 nm) traces for cell extract and purified RNA gradients and indication of how they were fractionated. Ribosome monosome and polysome peaks can be seen in the cell extract traces but not in the deproteinized RNA. 40, 60 and 80S are indicated. (B) Heatmap representing the abundance (normalized counts) of lncRNA and protein coding gene transcripts in gradient fraction of cell extracts. Columns are gradient fractions; rows are RNA transcripts. (C) Normalized distribution of GETs across gradient fractions. Dashed line represents the standard deviation of the distribution curve (width) of abundance for each GET in the indicated fraction.

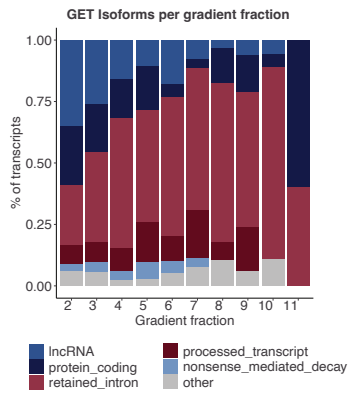

**Supplemental Fig S2.** Relative amount of GET isoform classes based on GENCODE/Ensembl annotation per gradient fraction.

Supplementary Figure S3

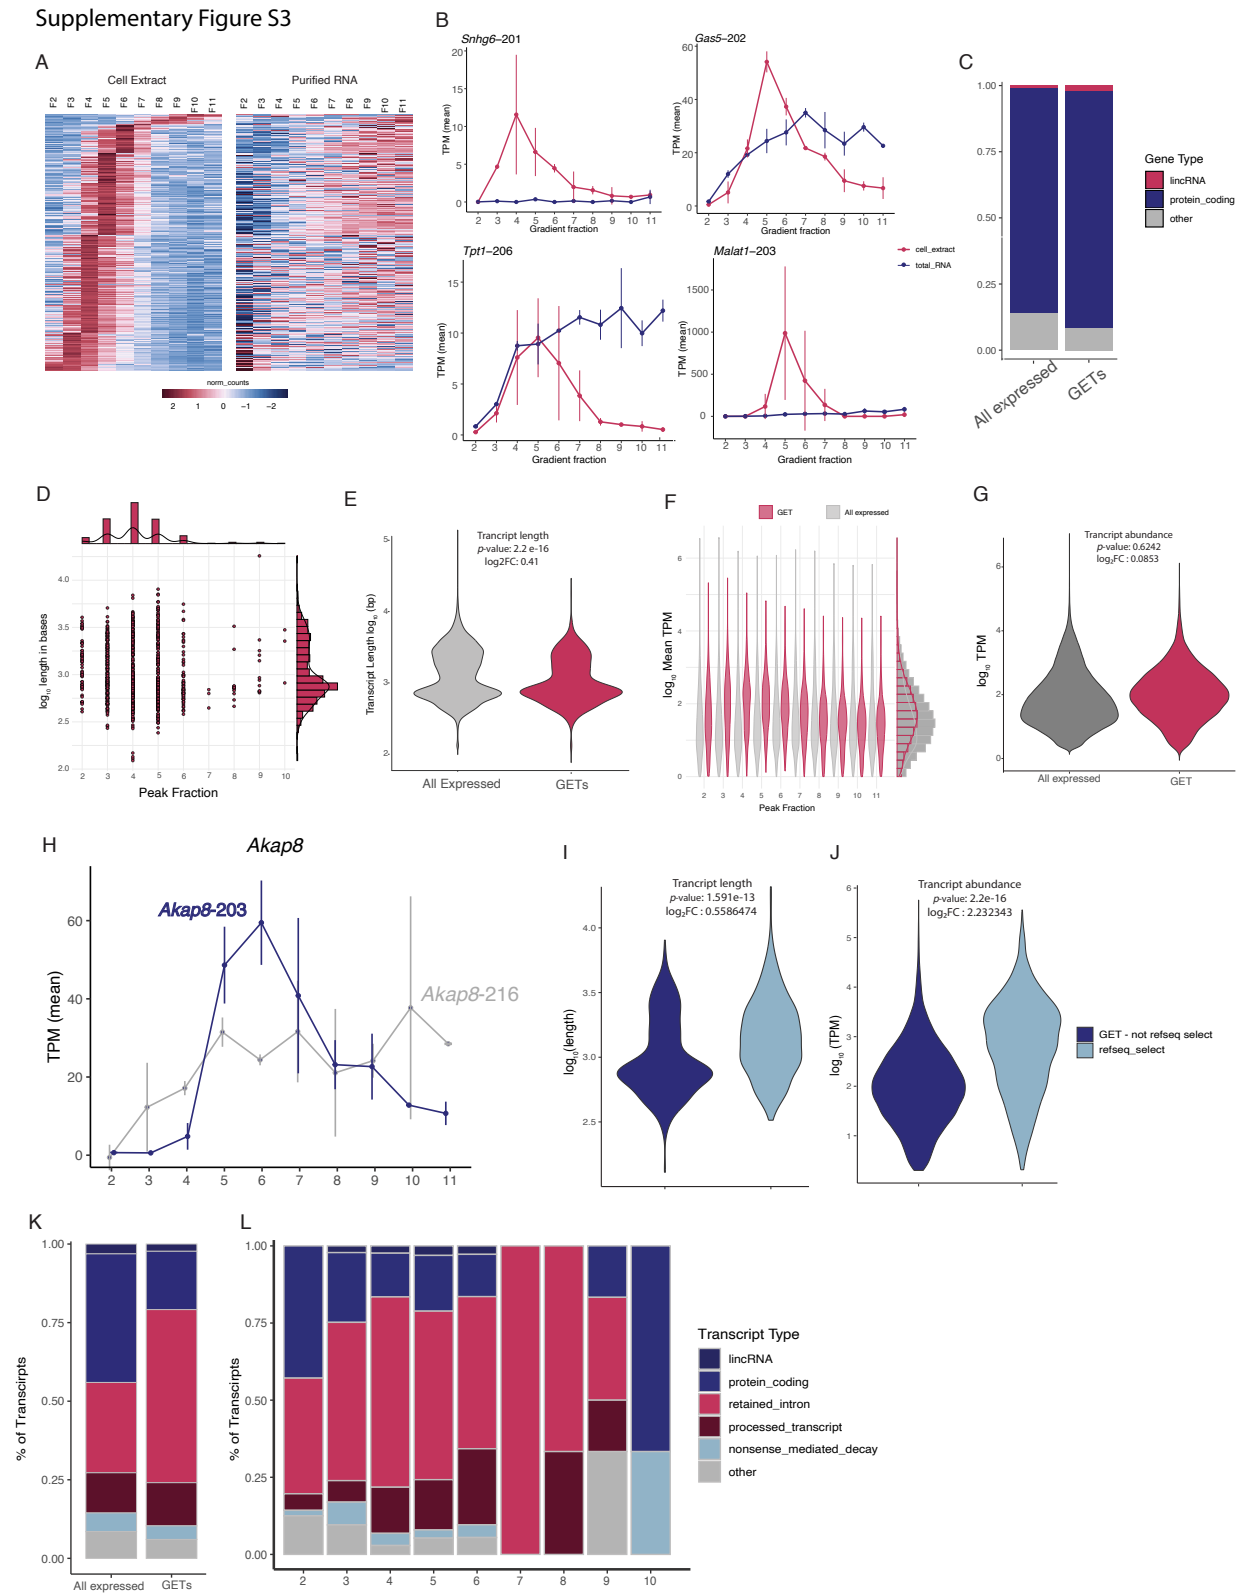

Supplemental Fig S3: Identification of Gradient Enriched Transcripts (GETs) in mESCs.

(A) Heatmap representing the abundance (normalized counts) of RNA transcripts in each gradient fraction of cell extracts and purified RNA gradients. Columns are gradient fractions; rows are RNA transcripts. (B) Examples of GETs and their RNA abundance throughout the gradient. (C) Bar plot of percentage of lncRNAs and protein coding genes in All-expressed and GETs. (D) GET length in nucleotides ( $\log_{10}$ ) in each gradient fraction that GETs showed maximum abundance (peak fraction). On the top and side, bar plots represent the number of events. (E) Distribution of GET length in nucleotides ( $\log_{10}$ ) compared to the other expressed transcripts in the cell (All-expressed). Log2FC, fold change ( $\log_2$ ) of median values. *P-value*, two-sided t-test. (F) GET abundance in TPM ( $\log_{10}$ ) in peak gradient fraction compared to other expressed transcripts in the cell (All-expressed). On the side, bar plots representing the number of events. (G) Distribution of GET abundance in TPM ( $\log_{10}$ ) compared to the other expressed transcripts in the cell (All-expressed). Log2FC, fold change ( $\log_2$ ) of median values. *P-value*, two-sided t-test. (H) RNA abundance throughout the gradient for *Akap8* isoforms. (I) Distribution of GET length in bases and (J) abundance in TPM ( $\log_{10}$ ) compared to RefSeq-select isoforms from the same gene. Log2FC, fold change ( $\log_2$ ); *p-value*, Two-sided T-test. (K) Relative amount of transcript isoform classes based on GENCODE/Ensembl annotation in All expressed transcripts and in GETs. (L) Relative amount of GET isoform classes based on Gencode/Ensembl annotation per gradient fraction.

**Supplementary Table S1:** Results of t-tests and Log2FoldChange analyses comparing the intron properties of GET-RI and validated GET-RI against all expressed RI events. The *Cond* column indicates the specific intron characteristic measured, while the *Group*

column specifies whether the value corresponds to the GET-RI or validated GET-RI group.

| <u>cond</u>                     | <u>log2FC</u> | <u>pvalue (t test)</u> | <u>pvalue (wilcoxon)</u> | <u>group</u>     |
|---------------------------------|---------------|------------------------|--------------------------|------------------|
| <u>PolypyrimidineTract</u>      | -0.2294818    | 9.80E-01               | 4.56E-02                 | GET-RI           |
| <u>IntronLength</u>             | -1.5208615    | 1.88E-66               | 1.33E-08                 | GET-RI           |
| <u>PercentageCG</u>             | 0.00362879    | 0.136844807            | 0.1352                   | GET-RI           |
| <u>IntronDepth</u>              | 3.58665861    | 9.70E-08               | 2.20E-16                 | GET-RI           |
| <u>IRratio</u>                  | 3.42092282    | 1.87E-22               | 2.20E-16                 | GET-RI           |
| <u>PresenceofMobileElements</u> | -0.3143859    | 6.79E-01               | 6.95E-01                 | GET-RI           |
| <u>Stability</u>                | 0.05306716    | 1.23368191766559e-319  | 2.20E-16                 | GET-RI           |
| <u>PolypyrimidineTract</u>      | 0             | 7.30E-02               | 4.77E-02                 | GET-RI validated |
| <u>IntronLength</u>             | -1.0689097    | 1.51E-14               | 2.20E-16                 | GET-RI validated |
| <u>PercentageCG</u>             | 0.08755743    | 3.95E-18               | 2.20E-16                 | GET-RI validated |
| <u>IntronDepth</u>              | 0.9011979     | 5.33E-09               | 2.20E-16                 | GET-RI validated |
| <u>IRratio</u>                  | 0.87209278    | 1.12E-12               | 2.20E-16                 | GET-RI validated |
| <u>Stability</u>                | 1.36798438    | 4.87E-62               | 2.20E-16                 | GET-RI validated |
| <u>PresenceofMobileElements</u> | 0.53067156    | 6.38E-01               | 5.87E-01                 | GET-RI validated |

**Supplementary Table S2:** Different cutoffs tested to define GETs. The first combination colored in red was used in this study.

| Parameters                                                                       |            |                                    | Number of GETs |
|----------------------------------------------------------------------------------|------------|------------------------------------|----------------|
| Gaussian fit                                                                     | FoldChange | Correlation to purified RNA (pval) |                |
| s <i>p</i> -value < 1e-2<br>m <i>p</i> -value < 1e-6<br>n <i>p</i> -value < 1e-6 | 10         | 0.001                              | 1057           |
| s <i>p</i> -value < 1e-2<br>m <i>p</i> -value < 1e-4<br>n <i>p</i> -value < 1e-4 | 10         | 0.001                              | 7051           |

|                                                                                  |    |       |       |
|----------------------------------------------------------------------------------|----|-------|-------|
| s <i>p</i> -value < 1e-2<br>m <i>p</i> -value < 1e-2<br>n <i>p</i> -value < 1e-2 | 10 | 0.001 | 14789 |
| s <i>p</i> -value < 1e-2<br>m <i>p</i> -value < 1e-6<br>n <i>p</i> -value < 1e-6 | 4  | 0.001 | 2129  |
| s <i>p</i> -value < 1e-2<br>m <i>p</i> -value < 1e-4<br>n <i>p</i> -value < 1e-4 | 4  | 0.001 | 11313 |
| s <i>p</i> -value < 1e-2<br>m <i>p</i> -value < 1e-2<br>n <i>p</i> -value < 1e-2 | 4  | 0.001 | 23136 |
| s <i>p</i> -value < 1e-2<br>m <i>p</i> -value < 1e-6<br>n <i>p</i> -value < 1e-6 | 10 | 0.01  | 904   |
| s <i>p</i> -value < 1e-2<br>m <i>p</i> -value < 1e-4<br>n <i>p</i> -value < 1e-4 | 10 | 0.01  | 5668  |
| s <i>p</i> -value < 1e-2<br>m <i>p</i> -value < 1e-2<br>n <i>p</i> -value < 1e-2 | 10 | 0.01  | 12166 |
| s <i>p</i> -value < 1e-2<br>m <i>p</i> -value < 1e-6<br>n <i>p</i> -value < 1e-6 | 4  | 0.01  | 1867  |
| s <i>p</i> -value < 1e-2<br>m <i>p</i> -value < 1e-4<br>n <i>p</i> -value < 1e-4 | 4  | 0.01  | 9405  |
| s <i>p</i> -value < 1e-2<br>m <i>p</i> -value < 1e-2<br>n <i>p</i> -value < 1e-2 | 4  | 0.01  | 19297 |

**Supplementary Table S3:** List of genes with possible unannotated intron retentions

found using IRFinder and manual curation.

| Gene         |
|--------------|
| <i>ITFG2</i> |
| <i>RBIS</i>  |

|                 |
|-----------------|
| <i>CGGBP1</i>   |
| <i>MRLP20</i>   |
| <i>PRDX6</i>    |
| <i>CCDC130</i>  |
| <i>CLDN12</i>   |
| <i>MAT2A</i>    |
| <i>NDUFB1</i>   |
| <i>ORMDL1</i>   |
| <i>MTL12A</i>   |
| <i>PROSER3</i>  |
| <i>PIM2</i>     |
| <i>UMPS</i>     |
| <i>TRAPPC2</i>  |
| <i>SCAMP4</i>   |
| <i>SNPRNP35</i> |
| <i>UPF3A</i>    |
| <i>SNX5</i>     |
| <i>ZBED5</i>    |
| <i>ZNF224</i>   |

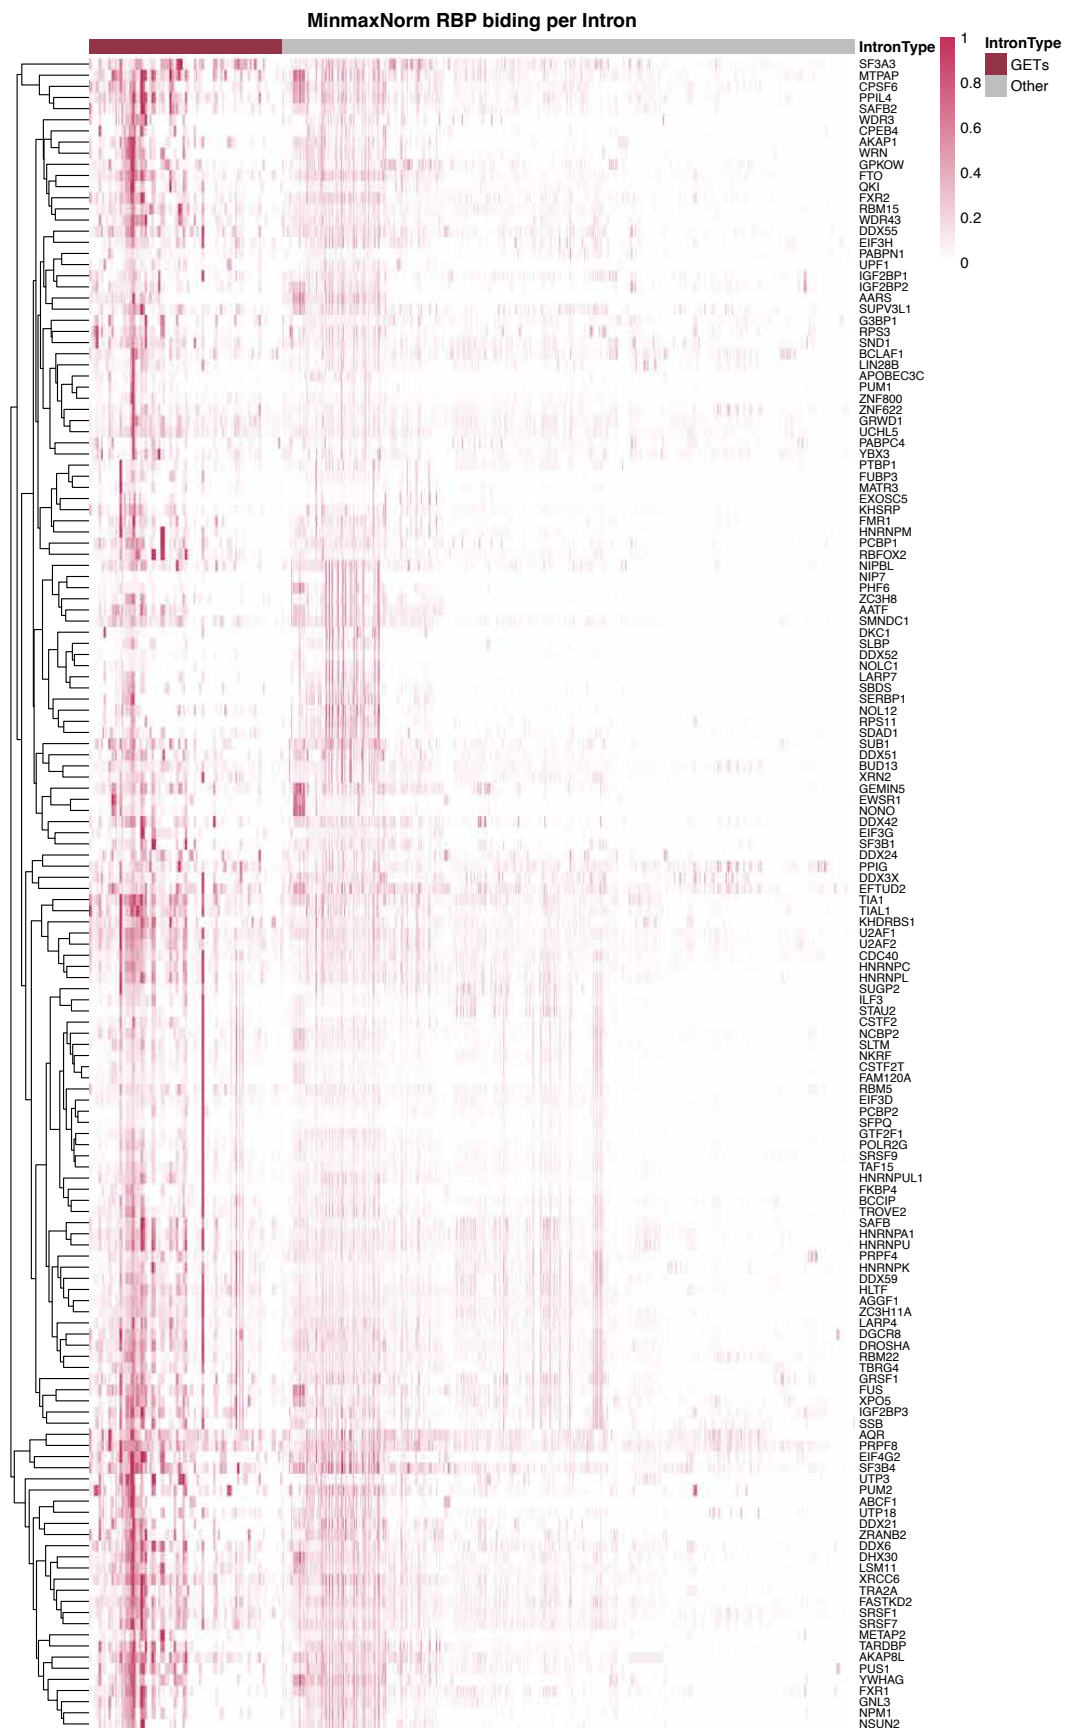



Figure S4. **Normalized RNA-binding protein (RBP) occupancy across intron types.**

The heatmap displays the normalized binding intensities (Min-Max scaled) of RBPs across two intron categories: GET introns and other introns of the same genes. Each row corresponds to an individual RBP, and each column represents a distinct intron. Color intensity reflects the relative binding score, with darker shades indicating higher binding affinity.

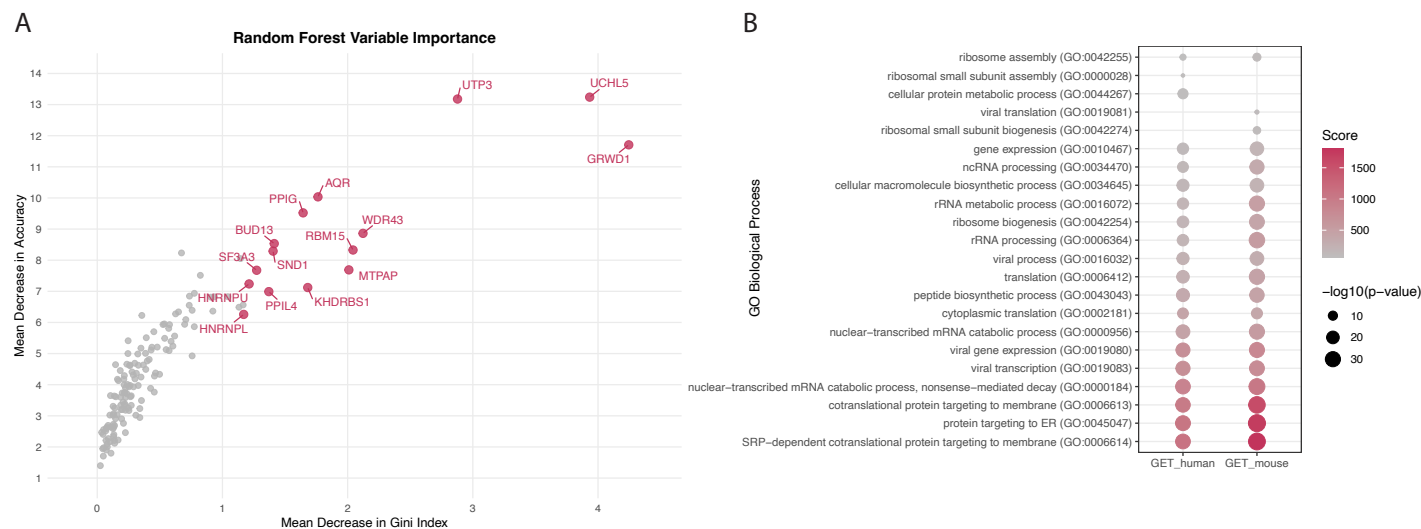

Figure S5: **Classification of RBP bidding using random forest and functional**

**enrichment of GET transcripts.** S5A: Scatter plot of the importance of each RBP in classifying between GET introns and all other introns. Each point represents an individual RBP, with the x-axis indicating the *Mean Decrease in Gini Index* and the y-axis showing the *Mean Decrease in Accuracy*, two metrics reflecting each variable's contribution to model performance. The top 15 RBPs, ranked by Gini importance, are highlighted in red and labeled. S5B: Dotplot of the top 15 pathways, ranked Score, that appeared in the functional enrichment of GET transcripts in human and mouse. On the

y axis the GO biological pathways and on the x axis human and mouse results. The radius of each dot represents the  $-\log_{10}$  of the  $p$ -value and the color intensity the score.
